# Supplementary material
Source: PubMed Central journal article supplement (PMC5310948)
Supplement: NIHMS848828-supplement-supplement_1.pdf [file NIHMS848828-supplement-supplement_1.pdf]

**SUPPLEMENTARY FILES**

**SUPPLEMENTARY TABLE 1** Characteristics of the training and validation datasets

|                                             | <b>Training dataset (n = 984)</b> | <b>Validation dataset (n = 299)</b> |
|---------------------------------------------|-----------------------------------|-------------------------------------|
|                                             | n (%) or median (IQR)             | n (%) or median (IQR)               |
| <b>OncotypeDX recurrence score</b>          | 16 (12–21)                        | 15 (10–21)                          |
| <b>OncotypeDX recurrence score category</b> |                                   |                                     |
| Low (< 18)                                  | 572 (58.1%)                       | 179 (59.9%)                         |
| Intermediate (18–30)                        | 338 (34.3%)                       | 99 (33.1%)                          |
| High (> 30)                                 | 74 (7.5%)                         | 21 (7.0%)                           |
| <b>Age (years)</b>                          | 57.7 (49.0–64.9)                  | 58.0 (49.6–67.2)                    |
| <b>Tumor size (mm)</b>                      | 11 (8–16)<br>(16 missing)         | 11 (8–16)                           |
| <b>ER status</b>                            | 95 (90–98)<br>(69 missing)        | 95 (90–99)                          |
| <b>PR status</b>                            | 80 (30–90)<br>(69 missing)        | 80 (40–95)                          |
| <b>HER2 IHC result &gt; 0</b>               | 633 (69.2%)<br>(69 missing)       | 210 (70.2%)                         |
| <b>Histologic grade</b>                     |                                   |                                     |
| 1                                           | 103 (11.4%)                       | 39 (13.3%)                          |
| 2                                           | 322 (35.6%)                       | 87 (29.7%)                          |
| 3                                           | 479 (53.0%)                       | 167 (57.0%)                         |
| Missing                                     | 80                                | 6                                   |
| <b>Nuclear grade</b>                        |                                   |                                     |
| 1                                           | 66 (8.1%)                         | 16 (5.4%)                           |
| 2                                           | 593 (72.6%)                       | 229 (76.6%)                         |
| 3                                           | 158 (19.3%)                       | 54 (18.1%)                          |
| Missing                                     | 167                               | 0                                   |

Abbreviations: ER, estrogen receptor; PR, progesterone receptor
